# Supplementary material
Source: publisher figshare collection journal article supplement (https://sage.figshare.com/ndownloader/files/17282780)
Supplement: Supplementary file 1 [file 17282780]

### Experimental phases

|              |                     | Phase 1 |  | Phase 2 |  | Test |  |  |
|--------------|---------------------|---------|--|---------|--|------|--|--|
| Stimulus Set | Training stimuli    |         |  |         |  |      |  |  |
|              |                     |         |  |         |  |      |  |  |
|              | Additivity training |         |  |         |  |      |  |  |
|              |                     |         |  |         |  |      |  |  |
|              | Target              |         |  |         |  |      |  |  |
|              | Control stimuli     |         |  |         |  |      |  |  |
| Non-Target   |                     |         |  |         |  |      |  |  |

Supplementary figure 4. Stimulus set 2 used for the other set of pigeons in Experiment 2.
